# Supplementary material for: The splicing modulator CLK1 is a candidate oncogenic dependency in pediatric high-grade gliomas
Source: PubMed Central journal article supplement (PMC11326178; doi:10.1101/2024.08.03.606419), 2024-08-06

## **Supplemental Figure Legends**

**Figure S1.** Pearson correlation plots of genome-wide poly-A and stranded PSI values for SE events in PT\_RYMG3M91 **(A)** and PT\_W5GP3F6B **(B)** showing high concordance across RNA library types. **(C)** UpsetR plot showing recurrent differential splicing events ( $N \geq 2$ ) that prefer exon inclusion. Cumulative distribution plots of splicing burden index (SBI) by histology for RI **(D)**, A5SS **(E)**, and A3SS **(F)** events. Correlation plots for SBI vs TMB across the entire cohort including **(G)** and excluding **(H)** hypermutant and ultra-hyper mutant tumors, or within histology **(I)** excluding hypermutant and ultra-hypermutant tumors. Pearson's R and p-values are shown.

**Figure S2.** **(A)** Stacked barplot showing tumor histology membership in each cluster stratified by molecular subtype for EPN, HGG, LGG and MB histologies. **(B)** Oncoprint displaying mutation frequencies of splicing factors and spliceosome component genes in HGGs sorted by splicing burden index. Additional annotations include gender, molecular subtype, CNS region, and tumor mutation status.

**Figure S3.** **(A)** Over-representation analysis of mis-spliced kinase genes that result in gain/loss of functional sites stratified by **(A)** exon skipping and **(B)** exon skipping. **(C)** Boxplot of *CLK1* exon 4-containing transcript expression in HGGs compared to GTEx normal brain tissues. **(D)** Oncoprint displaying mutation frequencies of key brain cancer genes in HGGs with annotations for *CLK1* exon 4 PSI, *CLK1-201* expression, total *NF1*, *NF1-215* PSI, *NF1* pS864 and pS2796 phosphoproteomic abundance, and total *NF1* protein abundance z-scores. Additional annotations include gender, molecular subtype, CNS region, and tumor mutation status. All boxplots represent the 25th and 75th percentile and the bar represents the median.

**Figure S4.** **(A)** Boxplot of dependency scores stratified by high vs low *CLK1* exon 4 containing transcript expression across all available DepMap brain tumor cell lines. Within histology

Wilcoxon p-values are shown. All boxplots represent the 25th and 75th percentile and the bar represents the median. **(B)** Cell viability assay after three days of treatment of KNS-42 cells with increasing concentrations of pan-DYRK/CLK1 inhibitor Cirtuvivint. **(C)** Heatmap displaying single-sample HALLMARK GSVA scores for DS genes affecting functional sites in cells treated with *CLK1* exon 4 morpholino or non-targeting morpholino. **(D)** Barplots illustrating the mean GSVA scores in panel **D** (n = 3 replicates per treatment). **(E)** Heatmap presenting single-sample DNA repair pathway GSVA scores for DS genes affecting functional sites in cells treated with *CLK1* exon 4 morpholino or non-targeting morpholino. **(F)** Barplots displaying mean DNA repair pathway GSVA scores from panel **E** (n = 3 replicates per treatment).

**Figure S5. (A)** Venn diagram showing the overlap of the total number of DS and DE genes. **(B)** Over-representation analysis of DE genes or **(C)** DS cancer genes that result in gain/loss of functional sites. **(D)** Ranked dotplot of significant CCMA v3 CRISPR gene dependency z-scores in individual CBTN cell lines with *CLK1* expression (red) and splicing-based (blue) target genes highlighted for HGG or **(E)** DMG patient-derived cell lines.

Figure S1

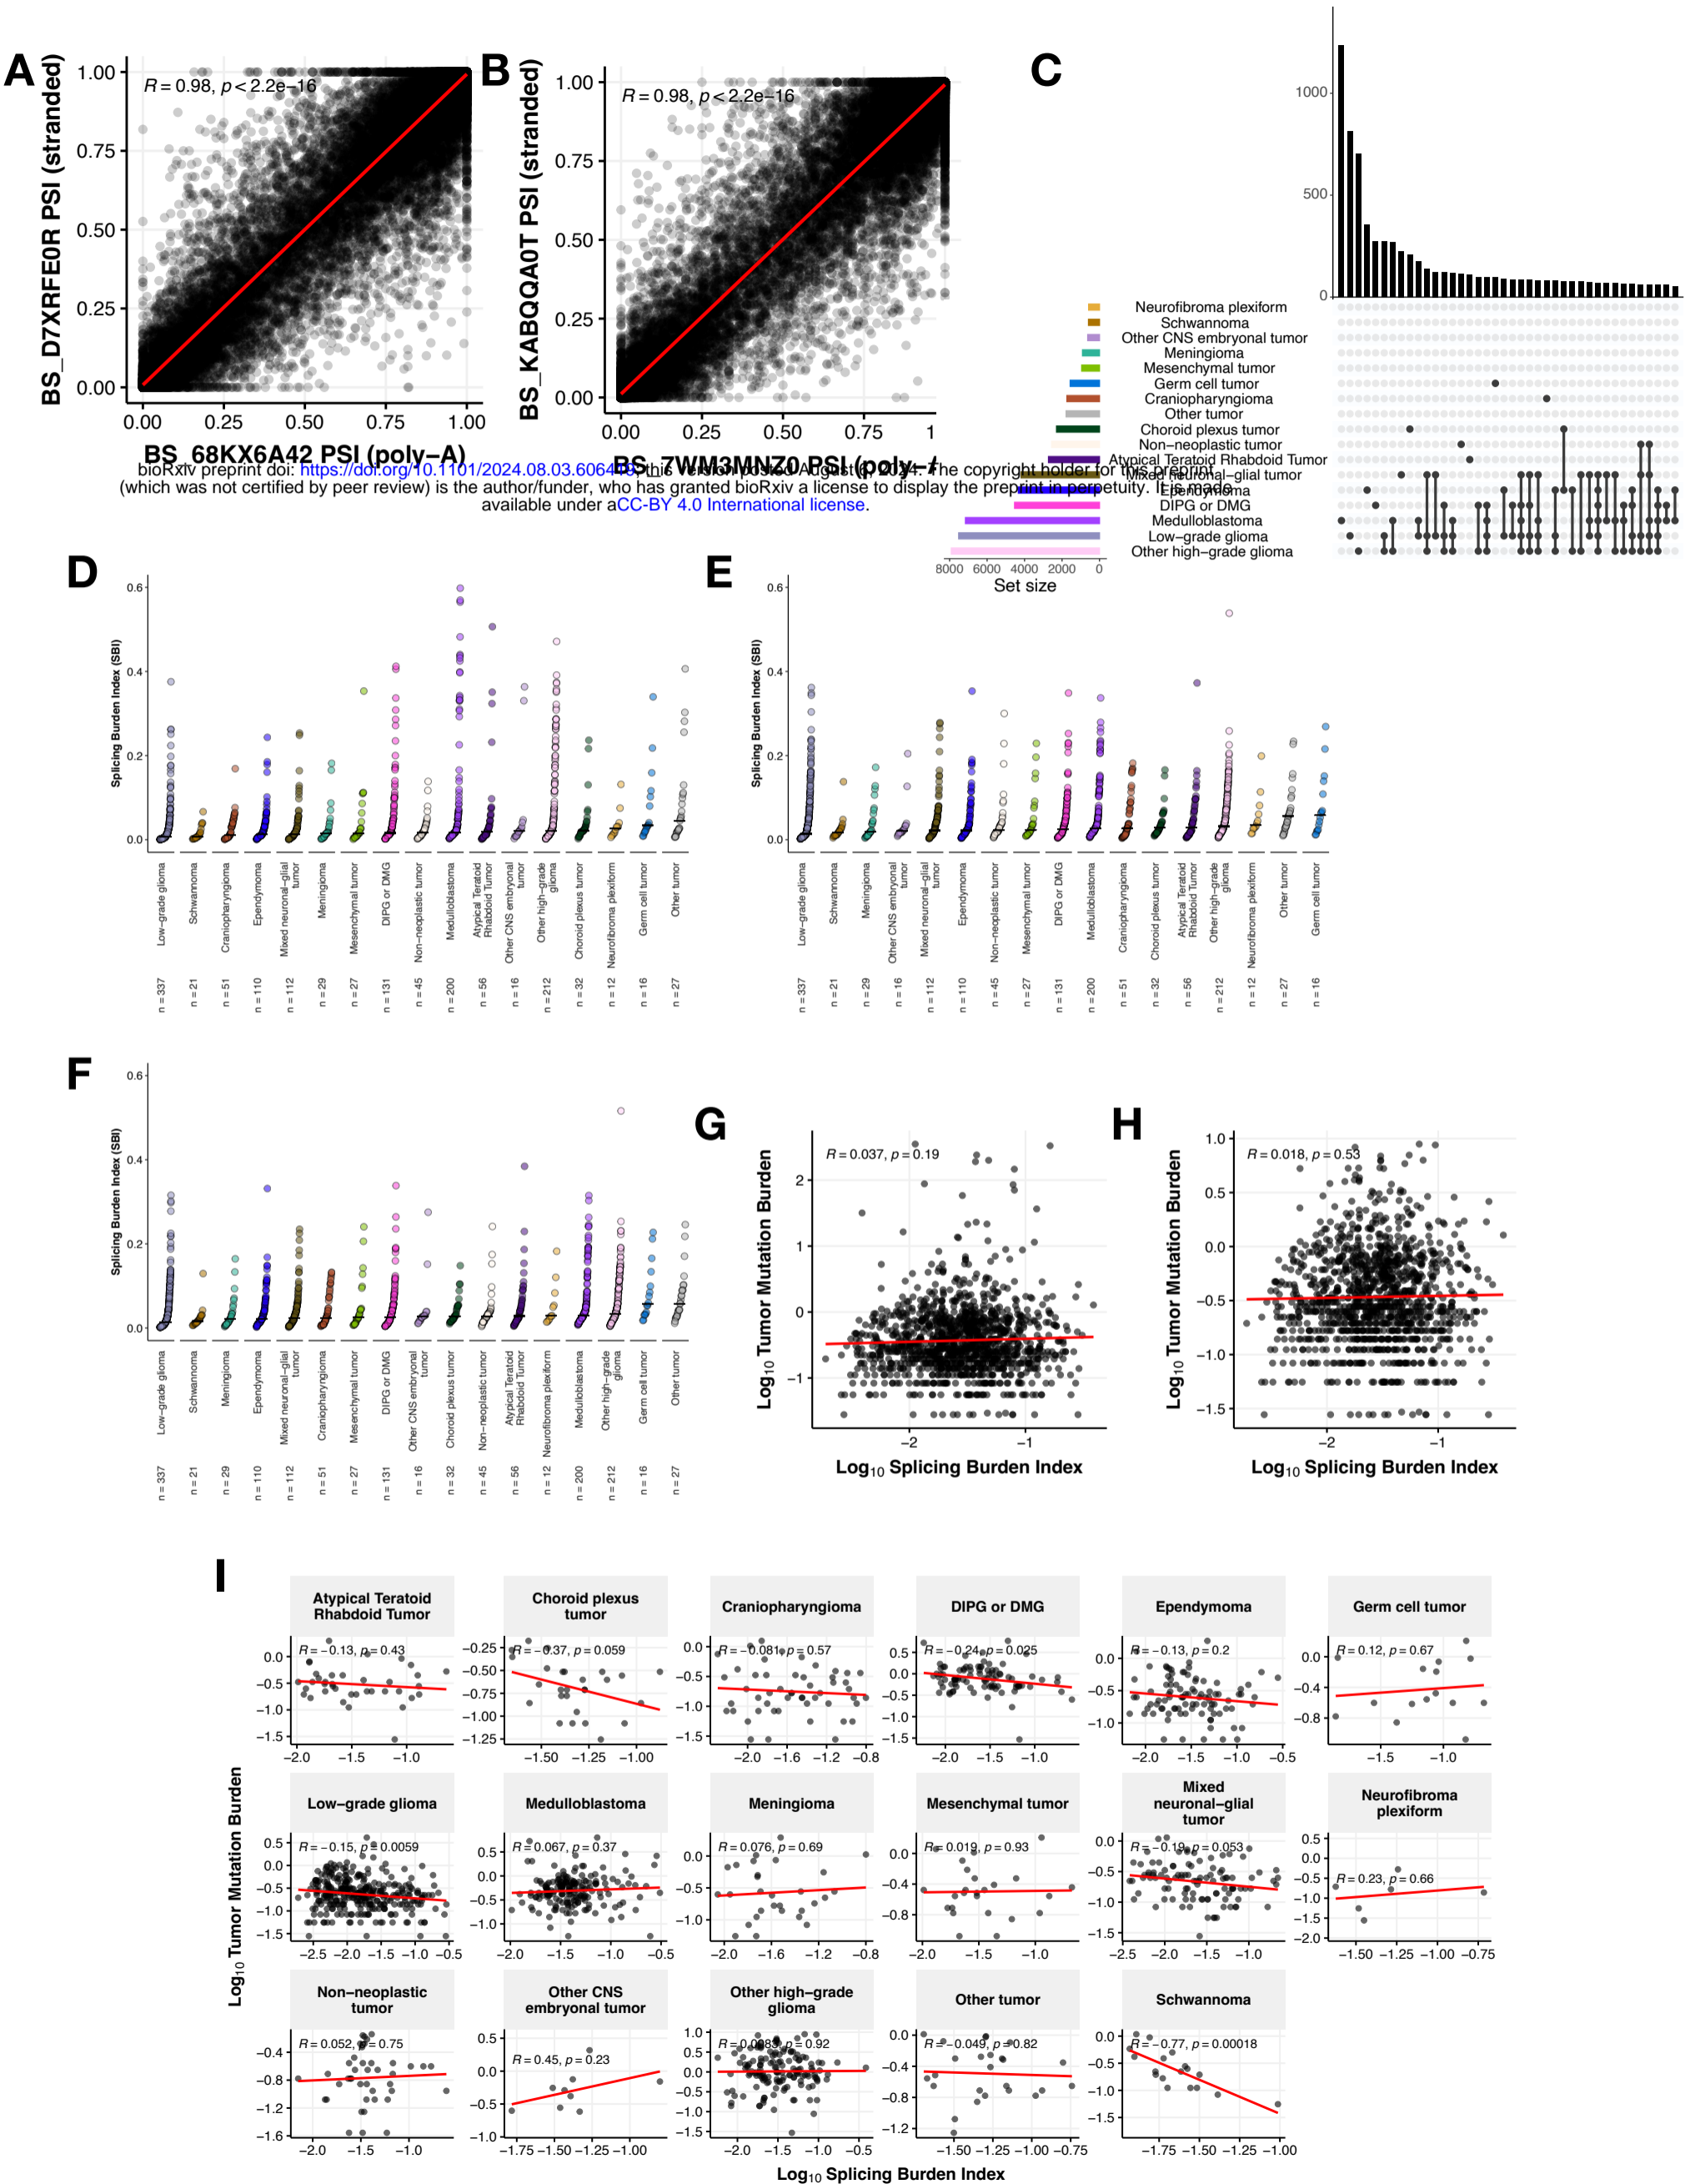



Figure S3

**A** Exon Skipping

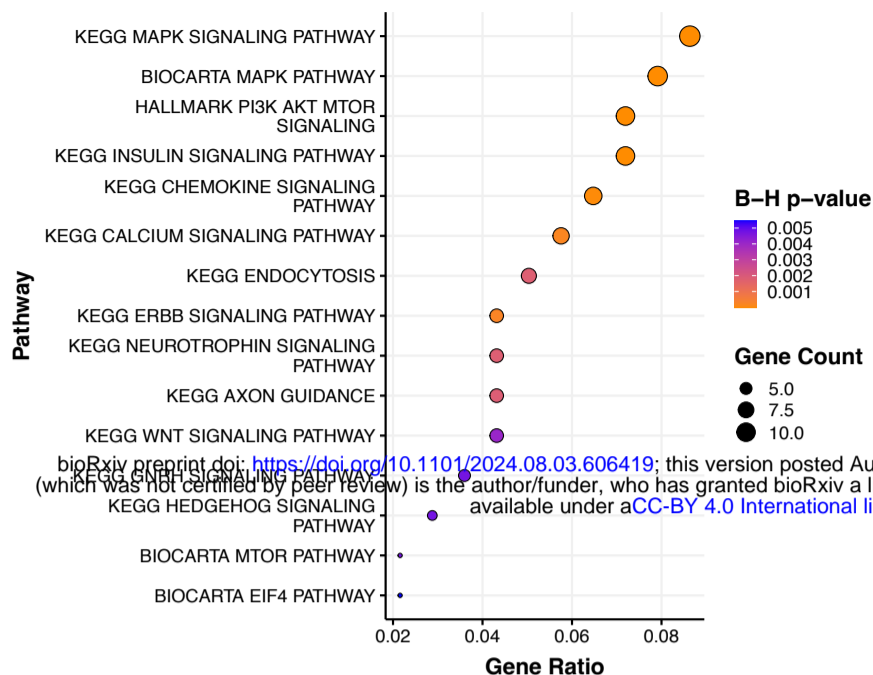

**B** Exon Inclusion

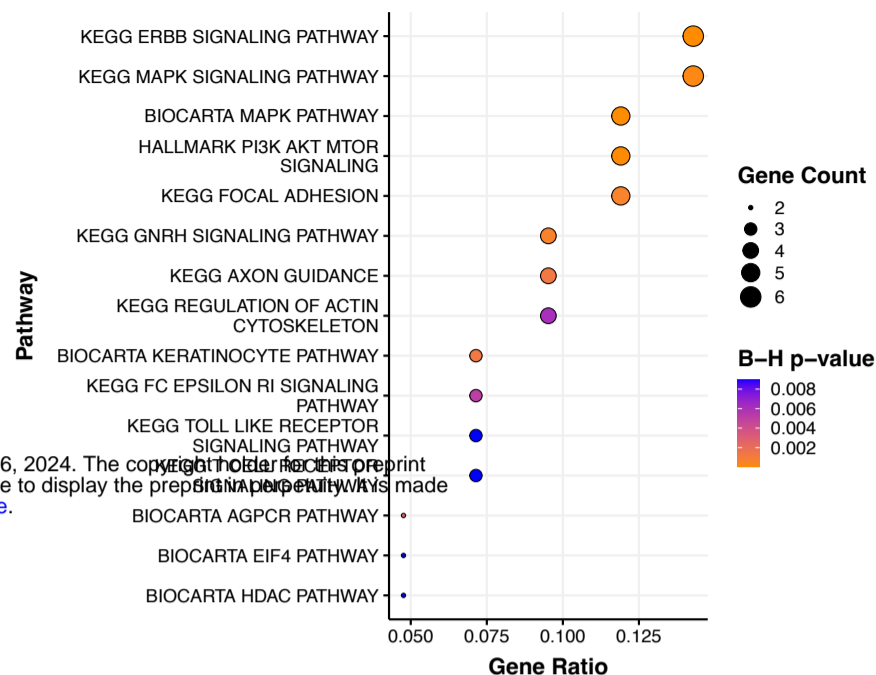

**C**

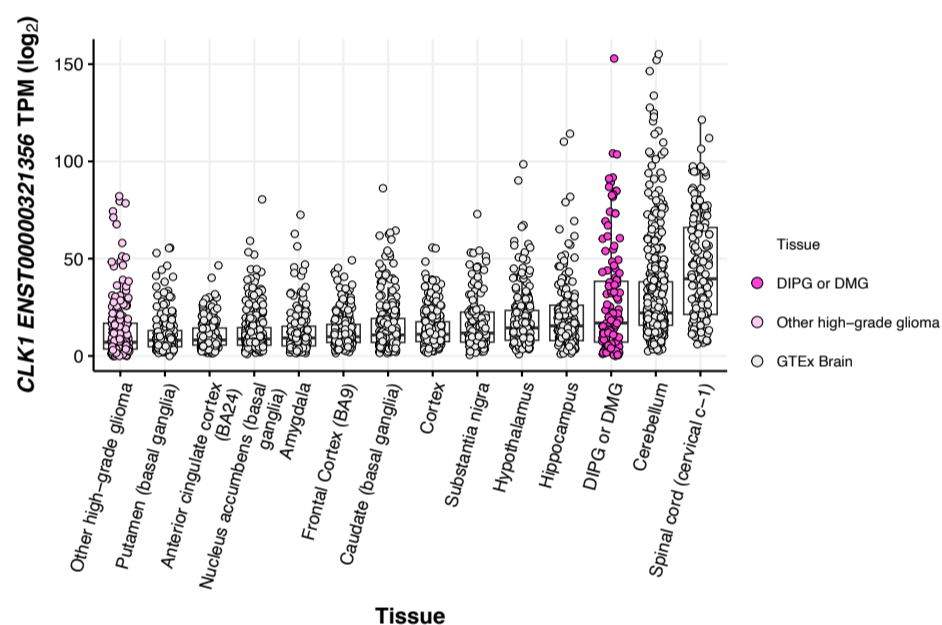

**D**

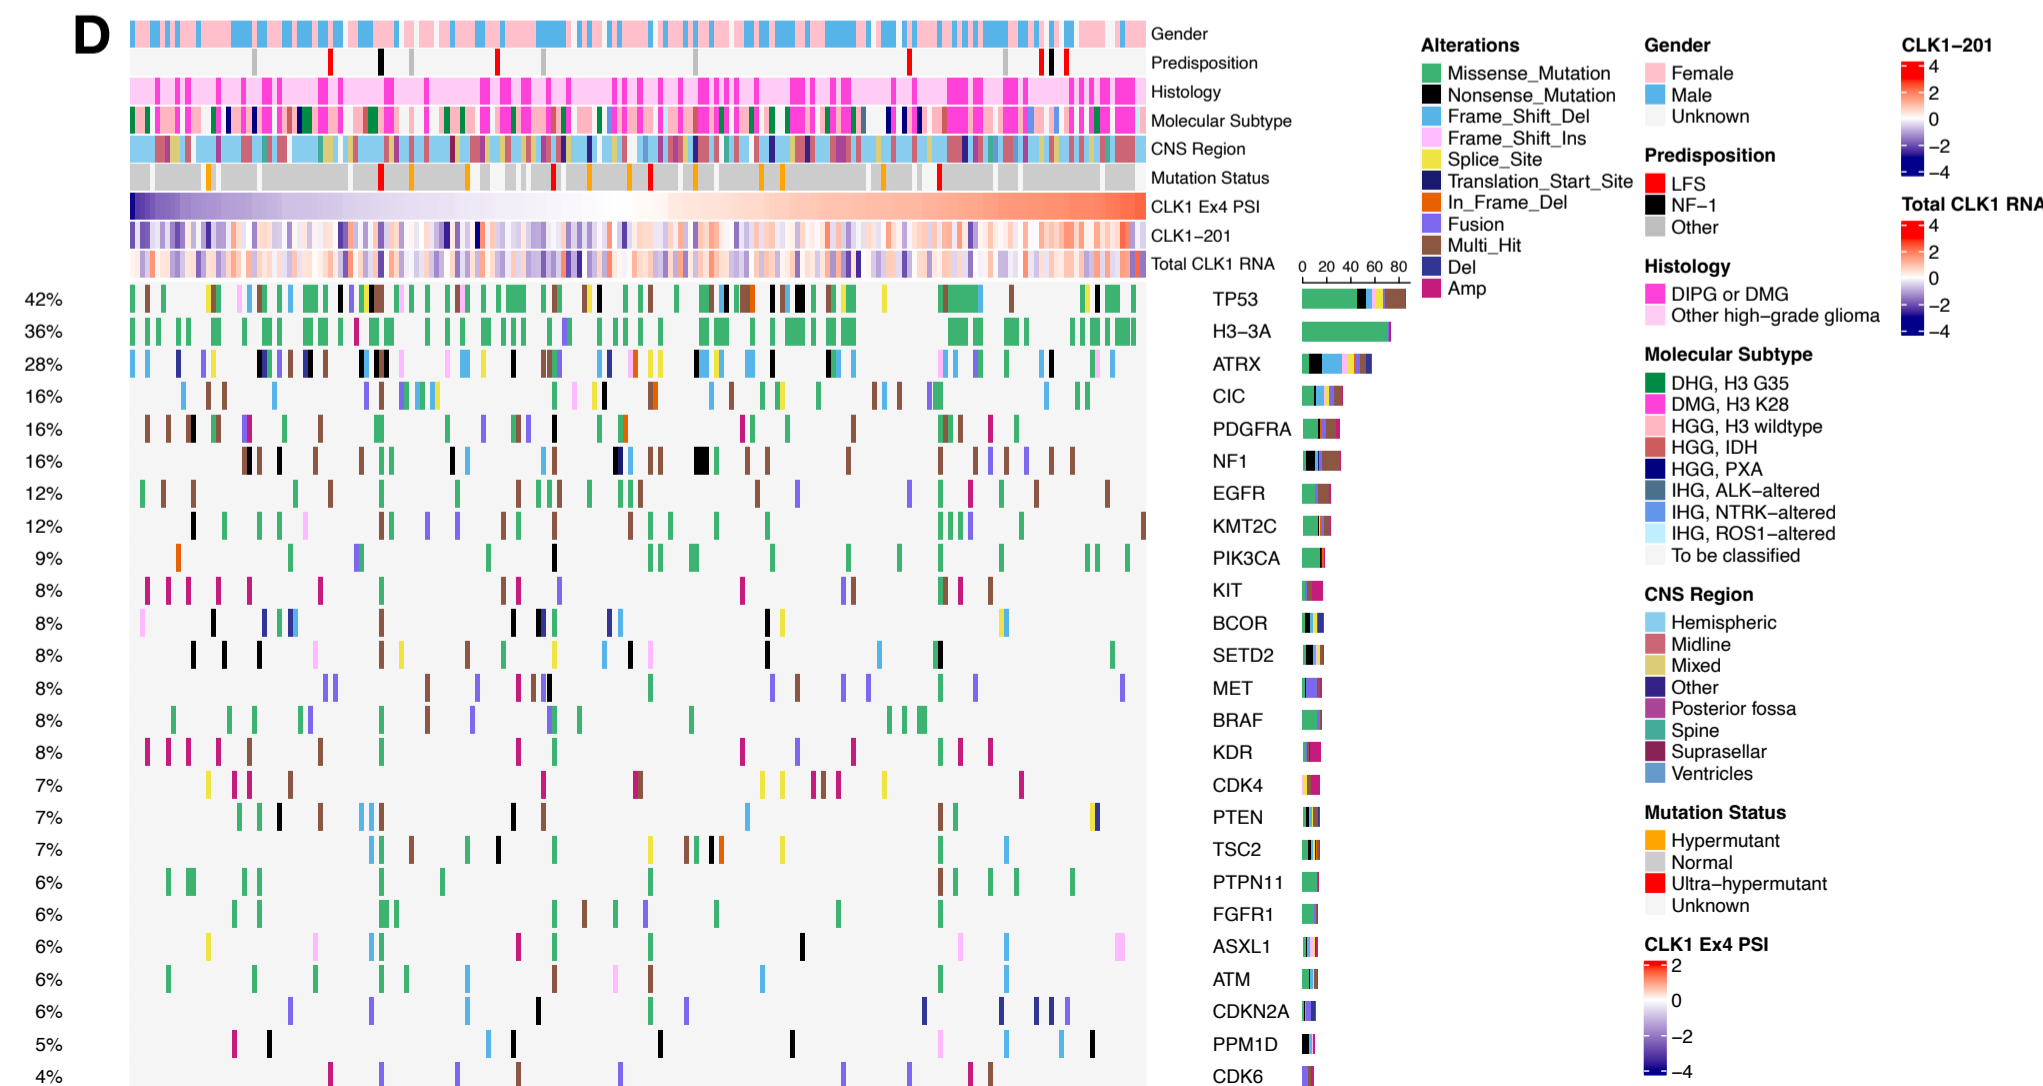

Figure S4

A

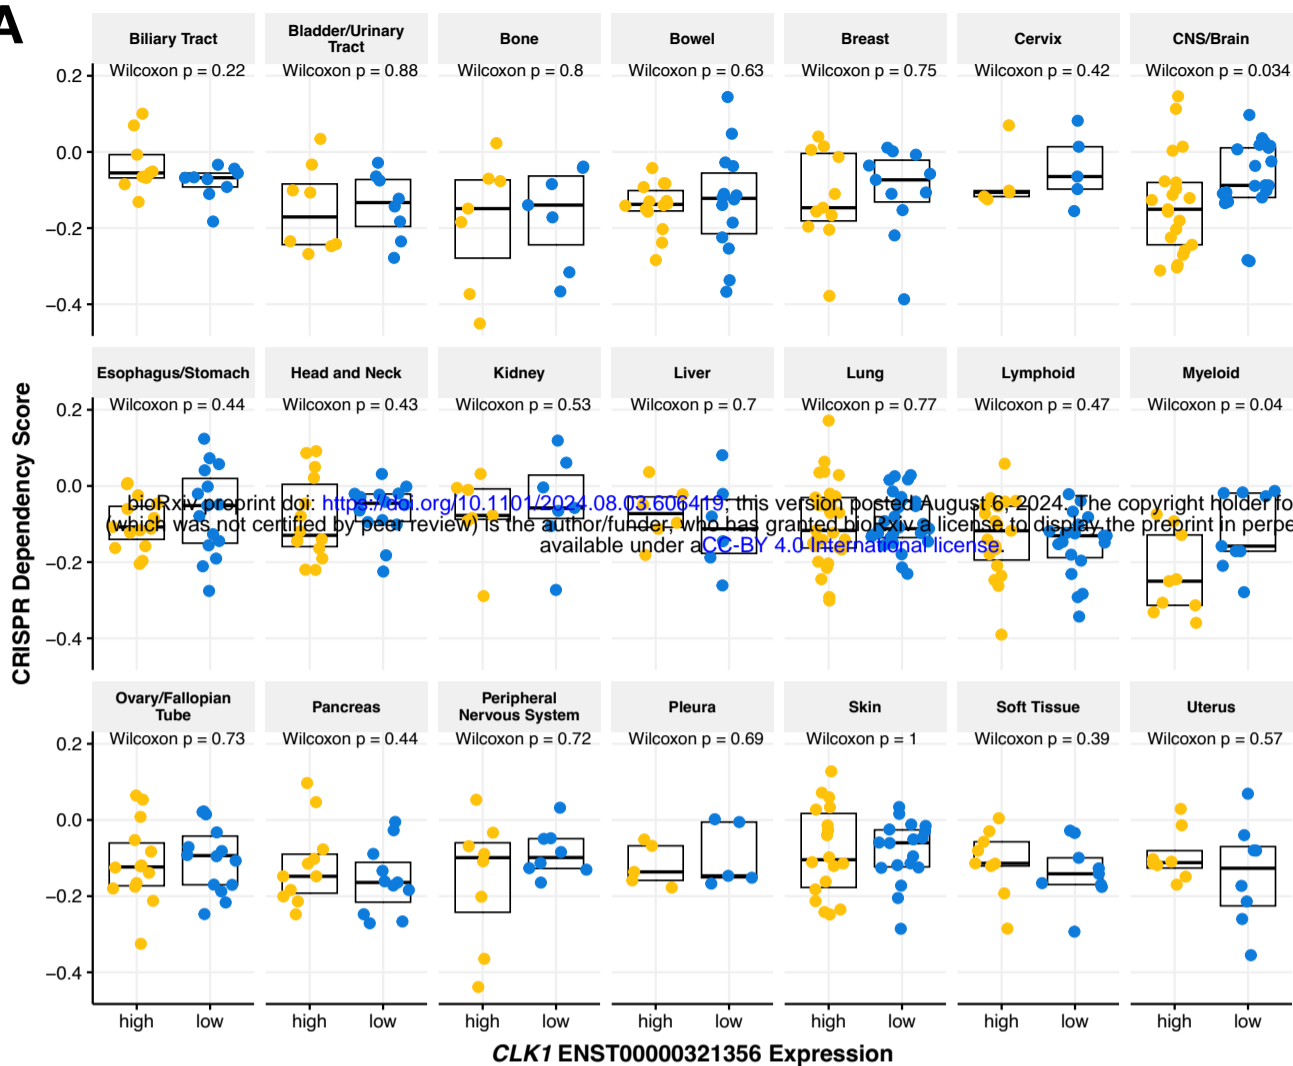

B

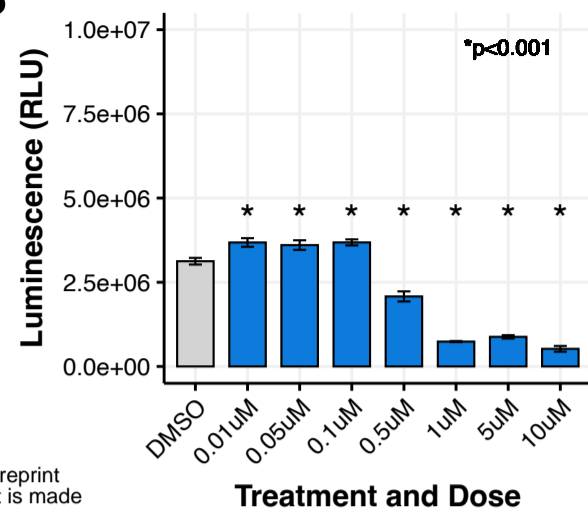

C

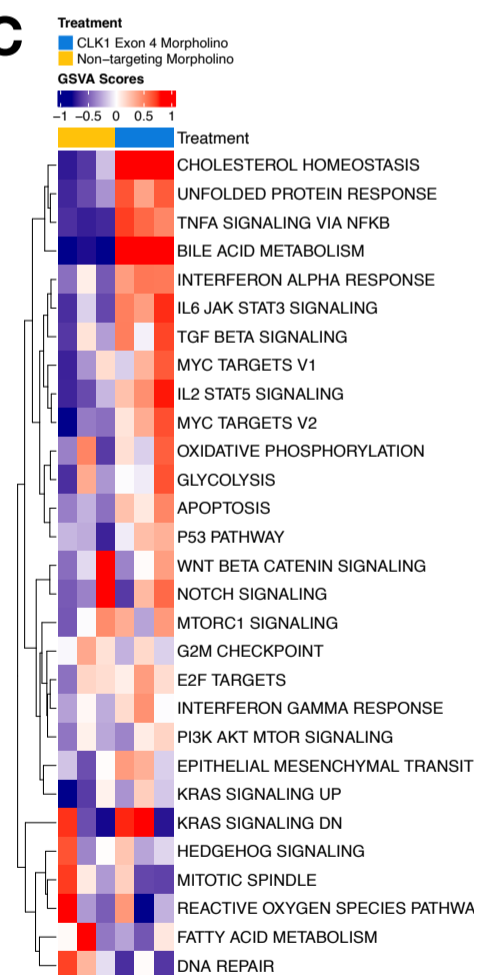

D

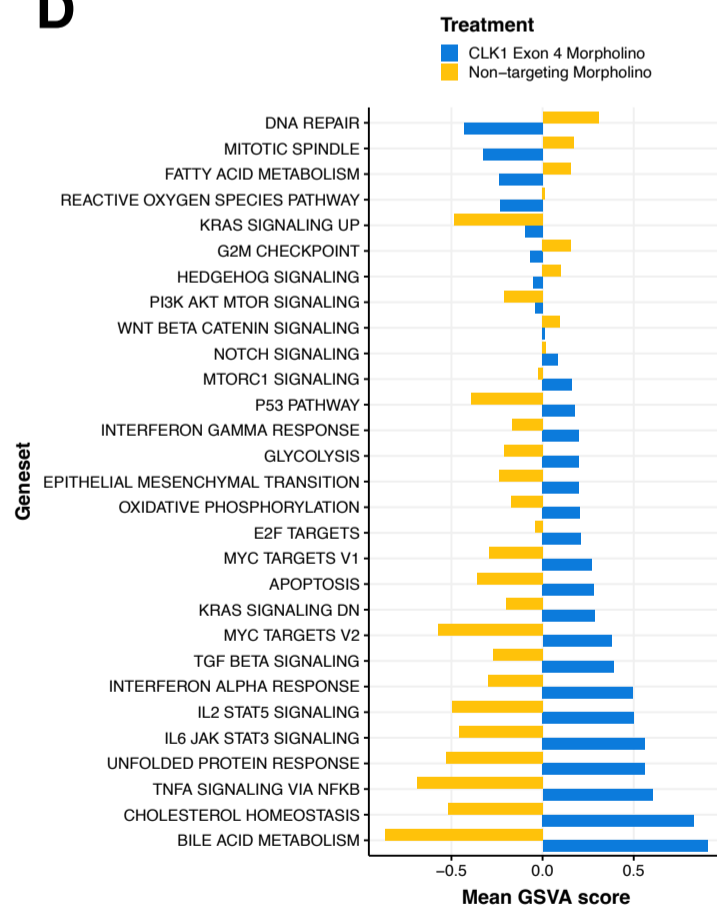

E

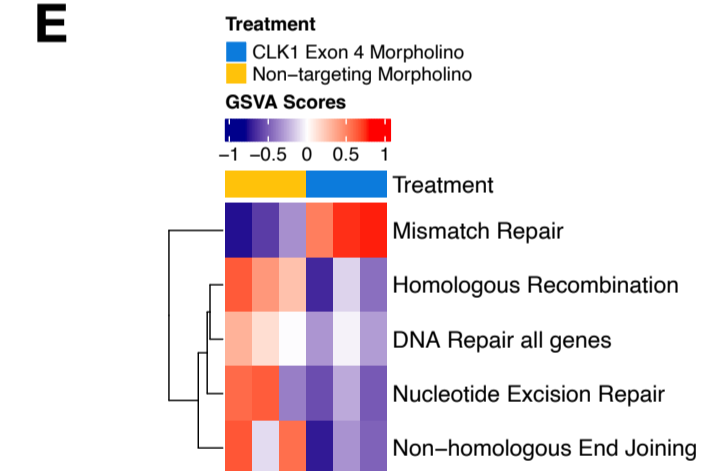

F

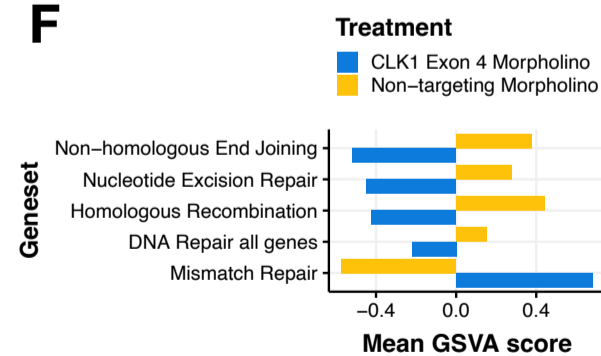

Figure S5

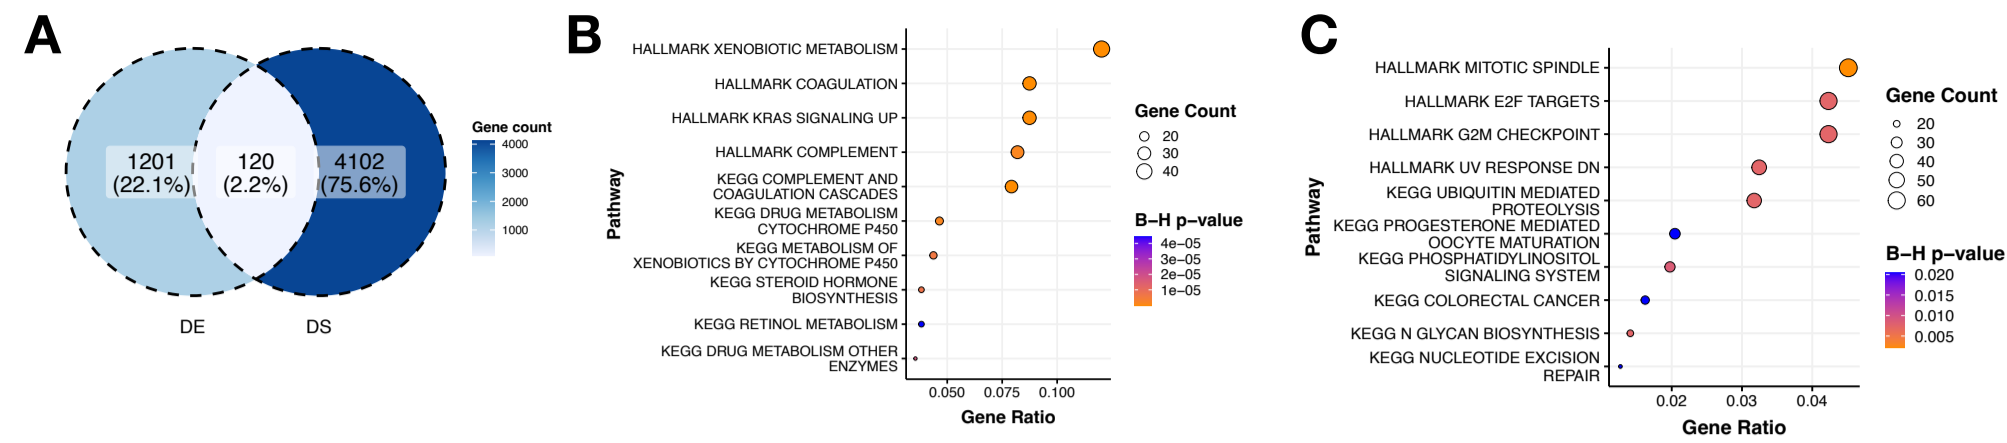

bioRxiv preprint doi: <https://doi.org/10.1101/2024.08.03.606419>; this version posted August 6, 2024. The copyright holder for this preprint (which was not certified by peer review) is the author/funder, who has granted bioRxiv a license to display the preprint in perpetuity. It is made available under a [CC-BY 4.0 International license](https://creativecommons.org/licenses/by/4.0/).

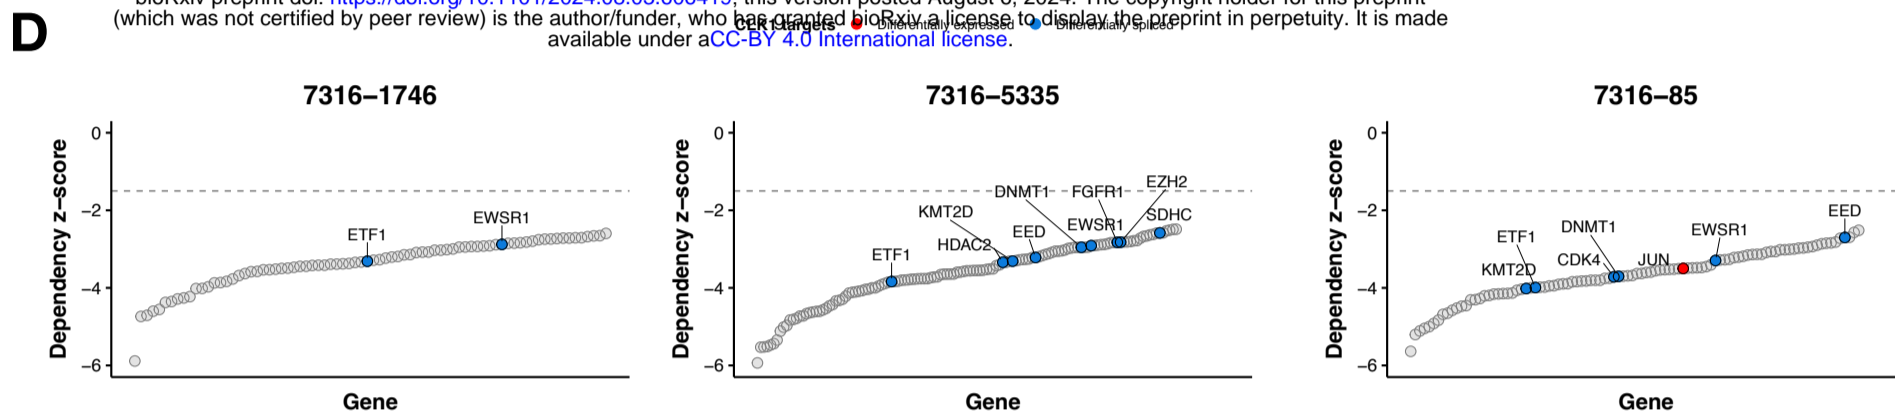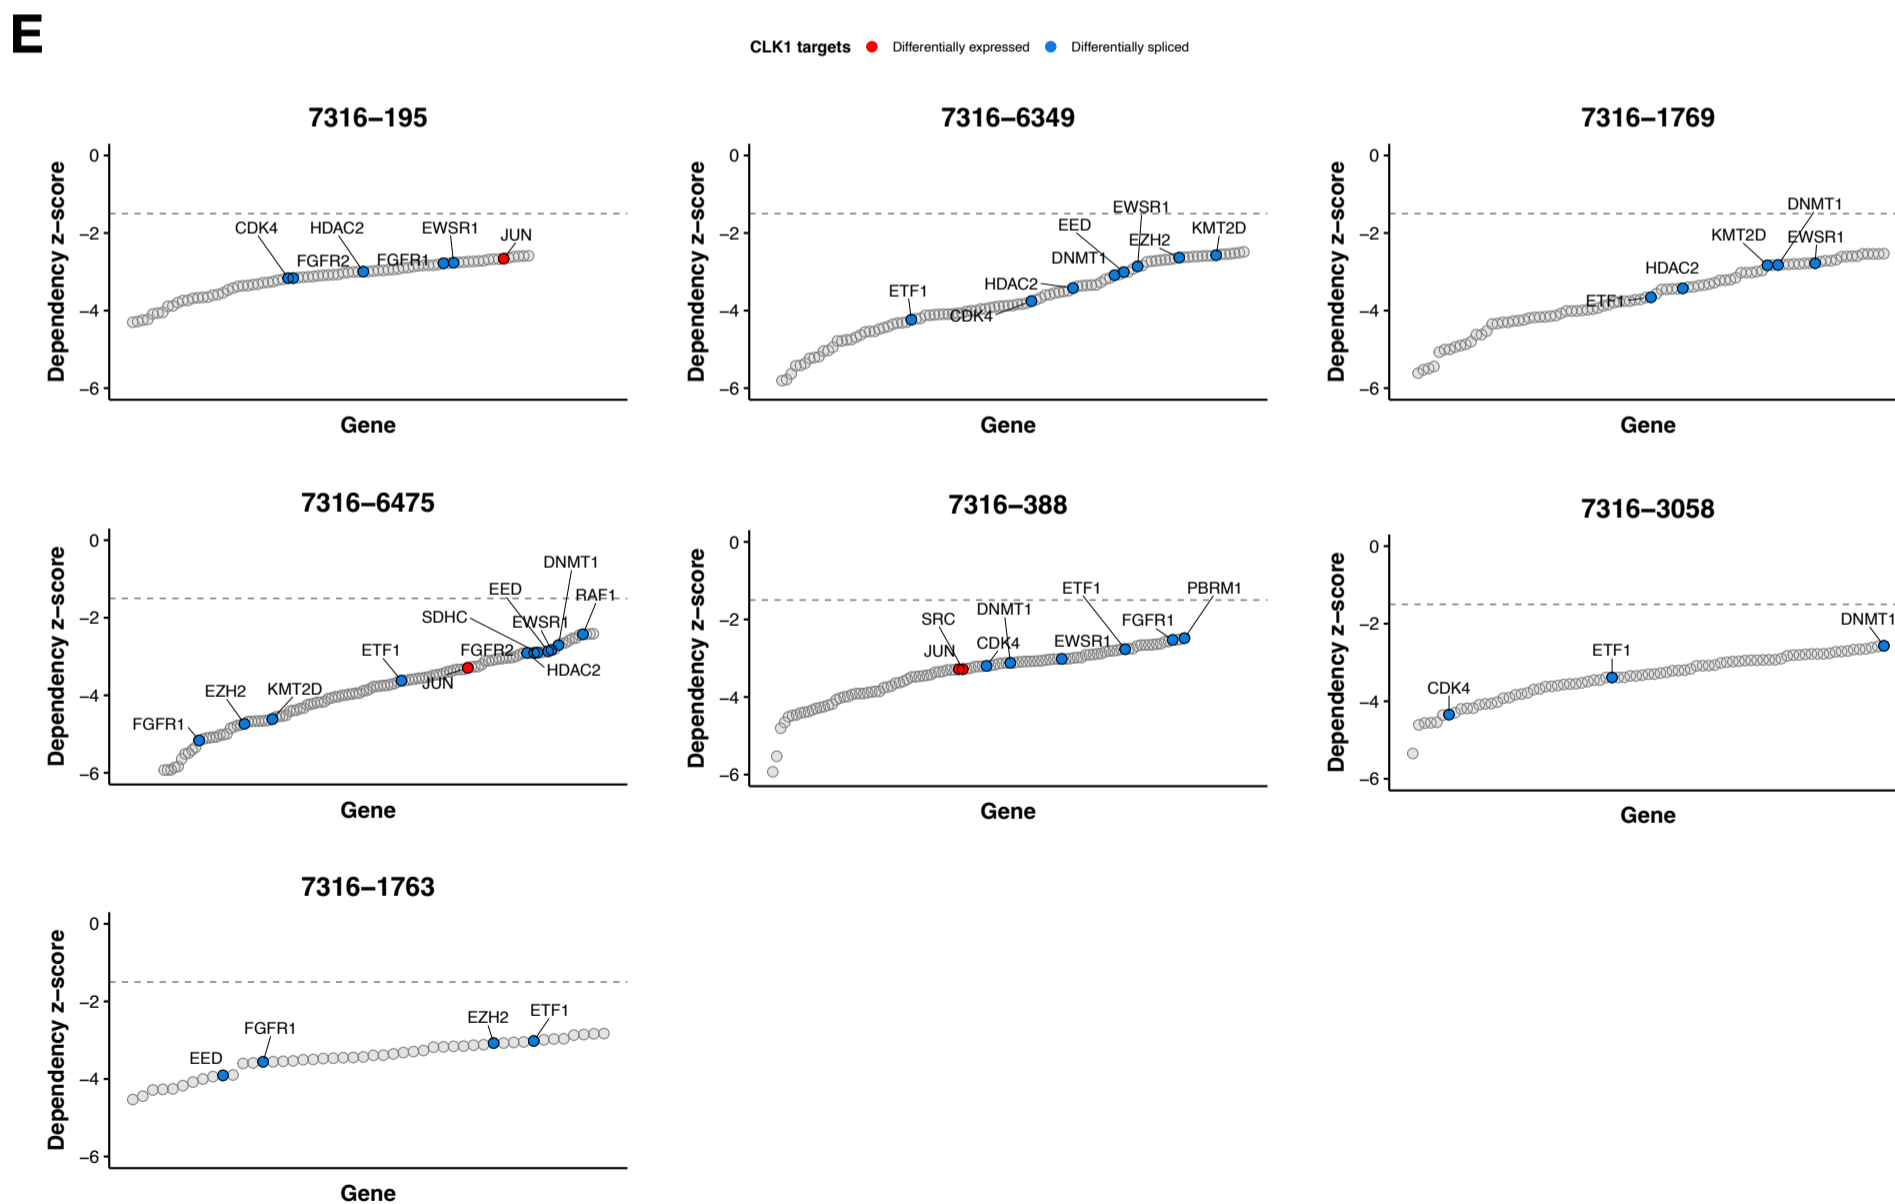

Supplement: NIHPP2024.08.03.606419v1-supplement-6.pdf [file NIHPP2024.08.03.606419v1-supplement-6.pdf]
